1 **Rare instances of non-random dropout with the monochrome multiplex qPCR assay for**  
2 **mitochondrial DNA copy number**

3

4 Stephanie Y. Yang<sup>1</sup>, Charles E. Newcomb<sup>1</sup>, Stephanie L. Battle<sup>1</sup>, Anthony YY. Hsieh<sup>2,3</sup>, Hailey L.

5 Chapman<sup>2,3</sup>, H  l  ne C. F. C  t  <sup>2,3</sup>, Dan E. Arking<sup>1</sup>

6

7 <sup>1</sup>McKusick-Nathans Department of Genetic Medicine, Johns Hopkins University School of  
8 Medicine, Baltimore, MD, USA

9 <sup>2</sup>Department of Pathology and Laboratory Medicine, The University of British Columbia,  
10 Vancouver, Canada

11 <sup>3</sup>Centre for Blood Research, The University of British Columbia, Vancouver, Canada

12

13 **Email addresses:**

14 syang93@jhmi.edu

15 cnewcom7@jhmi.edu

16 sbattl10@jhmi.edu

17 anthony\_y\_hsieh@hotmail.com

18 chapmanhailey@gmail.com

19 hcote@pathology.ubc.ca

20 arking@jhmi.edu

21 Mitochondrial DNA copy number (mtDNA-CN) is a proxy for mitochondrial function and has  
22 been of increasing interest to the mitochondrial research community. There are a number of  
23 ways to measure mtDNA-CN, ranging from qPCR to whole genome sequencing [1]. A recent  
24 article in the Journal of Molecular Diagnostics [2] described a novel method for measuring  
25 mtDNA-CN that is both inexpensive and reproducible. After adapting the assay for use in our  
26 lab, we have found it to be reproducible and well-correlated with mtDNA-CN derived from  
27 whole genome sequencing. However, certain individuals show poor concordance between the  
28 two measures, particularly individuals with qPCR mtDNA-CN measurements  $>3$  standard  
29 deviations below the sample mean, which corresponds to roughly 1% of assayed individuals  
30 (Figure 1). After examining whole genome sequencing data, this seems to be due to specific  
31 polymorphisms within the D-loop primer region, at positions MT 338, 340, 452, 457, 458, 460,  
32 461, 466, and 467. All individuals with a variant in at least one of these positions have non-  
33 concordant mtDNA-CN measurements. Meanwhile, variants observed at other positions within  
34 the primer region do not appear to cause dropout.

35

36 In particular, individuals from the U, L, and T mitochondrial haplogroups appeared to be more  
37 susceptible to failure. We classified discordant qPCR measurements as  $>3$  standard deviations  
38 below the mean qPCR measurement (red dotted line), then used binomial logistic regressions  
39 to evaluate associations between discordant measurements and all haplogroups. Indeed, the U  
40 ( $p = 0.002$ ), L1 ( $p = 0.041$ ), L4 ( $p = 0.0003$ ), and T ( $p = 0.015$ ) haplogroups each had significantly  
41 greater individuals with discordant measurements. All other haplogroups, including L2 and L3,

42 were not significantly associated with discordant measures. However, this could be due to  
43 limited power due to small sample sizes for certain haplogroups.  
44  
45 We hereby want to make other researchers aware of this non-random dropout, and of the  
46 need to confirm extremely low measurements obtained from this assay by using alternative  
47 assays that target other regions of the mitochondrial genome.

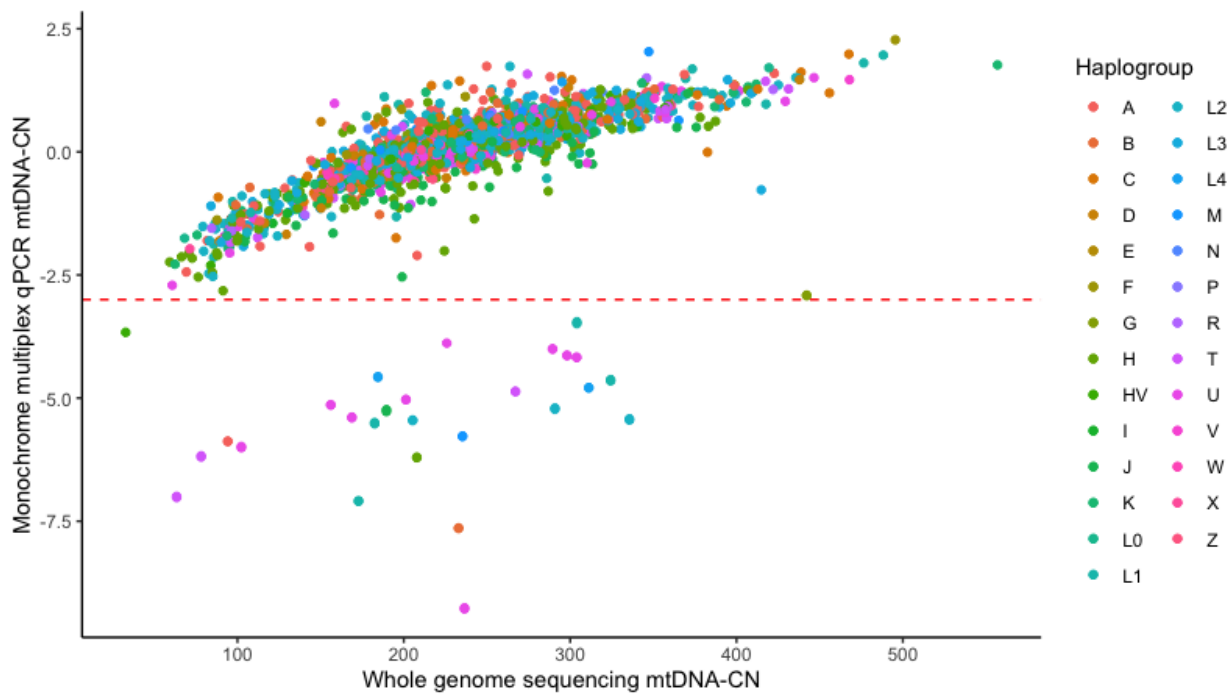

48  
49 Figure 1. Discrepancy between the monochrome multiplex qPCR mtDNA-CN and the whole  
50 genome sequencing mtDNA-CN for 1,732 distinct individuals. Data are centered at 0 and scaled  
51 so that the standard deviation = 1. The dotted red line represents 3 standard deviations  
52 beneath the sample mean. Individuals in the U, L1, L4, and T haplogroups have a  
53 disproportionately higher risk of discordant measures between the two assays.

54 **Acknowledgements**

55 This work utilized participants from the Multi-ethnic Study of Atherosclerosis (dbGaP accession:  
56 phs000209.v13.p3).

### 57 **Funding sources**

58 This work was supported by National Heart, Lung and Blood Institute, National Institutes of  
59 Health (NIH) grants R01HL13573 and R01HL144569.

### 60 **Bibliography**

- 61 1. Longchamps RJ, Castellani CA, Yang SY, Newcomb CE, Sumpter JA, Lane J, et al. Evaluation  
62 of mitochondrial DNA copy number estimation techniques. PLOS ONE. 2020;15: e0228166.  
63 doi:10.1371/journal.pone.0228166
- 64 2. Hsieh AYY, Budd M, Deng D, Gadawska I, Côté HCF. A Monochrome Multiplex Real-Time  
65 Quantitative PCR Assay for the Measurement of Mitochondrial DNA Content. The Journal of  
66 Molecular Diagnostics. 2018;20: 612–620. doi:10.1016/j.jmoldx.2018.05.001

67
